# Supplementary material
Source: PubMed Central journal article supplement (PMC6007124)
Supplement: AEM.00604-18_zam013188577s1.pdf [file AEM.00604-18_zam013188577s1.pdf]

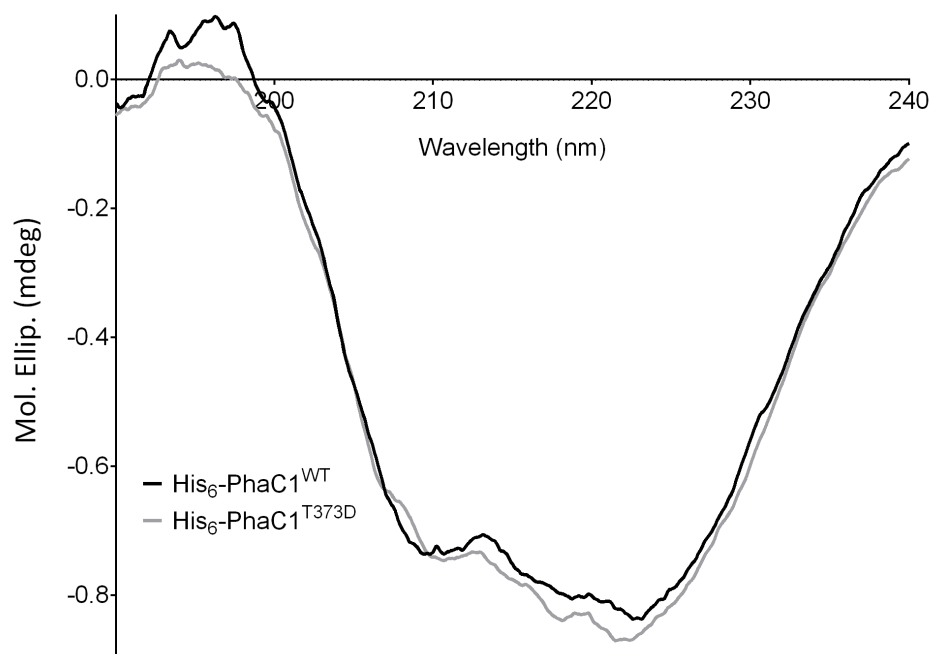

20 **Supplementary materials Fig. S1:** CD spectrum of purified His<sub>6</sub>-PhaC1<sup>WT</sup> and His<sub>6</sub>-PhaC1<sup>T373D</sup>

25

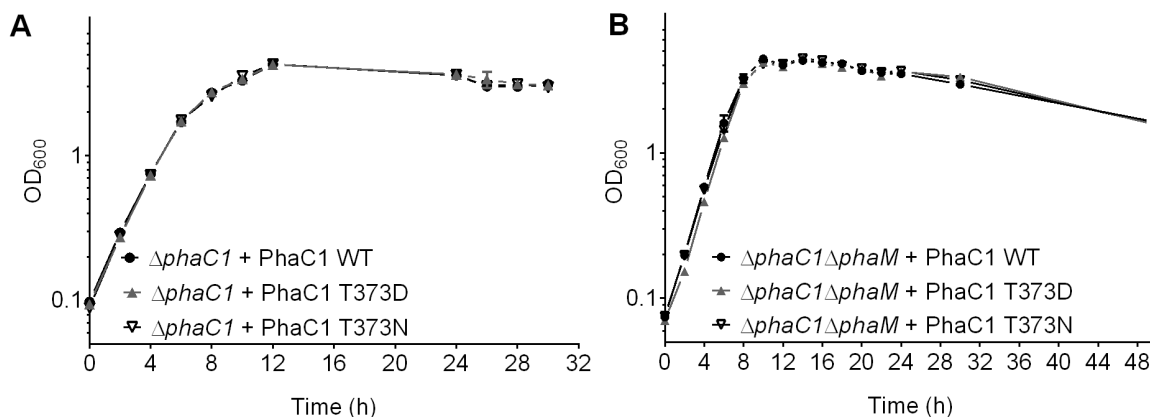

30 **Supplementary materials Fig. S2: Growth of *R. eutropha* H16 strains** (A) Growth of *R. eutropha*  $\Delta phaC1$  (pBBR1MCS2\_ $p_{phaC}$ \_phaC1\_eyfp), *R. eutropha*  $\Delta phaC1$  (pBBR1MCS2\_ $p_{phaC}$ \_phaC1\_T373D\_eyfp), *R. eutropha*  $\Delta phaC1$  (pBBR1MCS2\_ $p_{phaC}$ \_phaC1\_T373N\_eyfp) on NB-medium with 0.2% gluconate. (B) Growth of *R. eutropha*  $\Delta phaC1 \Delta phaM$  (pBBR1MCS2\_ $p_{phaC}$ \_phaC1\_eyfp), *R. eutropha*  $\Delta phaC1 \Delta phaM$  (pBBR1MCS2\_ $p_{phaC}$ \_phaC1\_T373D\_eyfp), *R. eutropha*  $\Delta phaC1 \Delta phaM$  (pBBR1MCS2\_ $p_{phaC}$ \_phaC1\_T373N\_eyfp) on NB-medium with 0.2% gluconate. Error bars show the standard deviation.

35

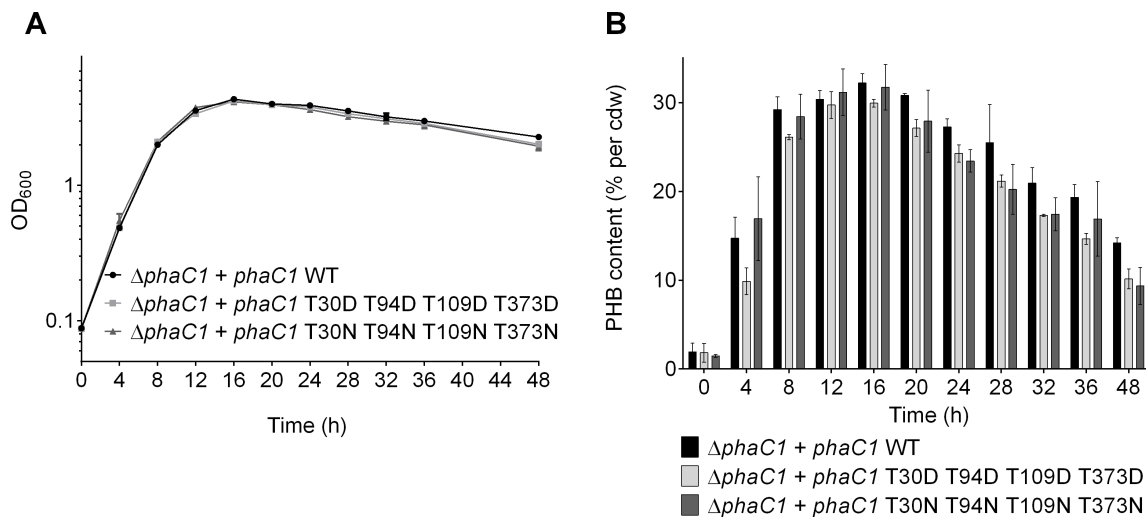

40 **Supplementary materials Fig. S3: Growth and PHB accumulation of *R. eutropha* H16 strains over 48 h.** Growth (A) and PHB contents (B) of *R. eutropha*  $\Delta phaC1$  (pBBR1MCS2\_*p<sub>phaC</sub>\_phaC1\_eyfp*), *R. eutropha*  $\Delta phaC1$  (pBBR1MCS2\_*p<sub>phaC</sub>\_phaC1\_T30D\_T94D\_T109D\_T373D\_eyfp*) and *R. eutropha*  $\Delta phaC1$  (pBBR1MCS2\_*p<sub>phaC</sub>\_phaC1\_T30N\_T94N\_T109N\_T373N\_eyfp*) on NB-medium with 0.2% Na-gluconate. Results were obtained from biological triplicates; error bars show the standard deviation.

45

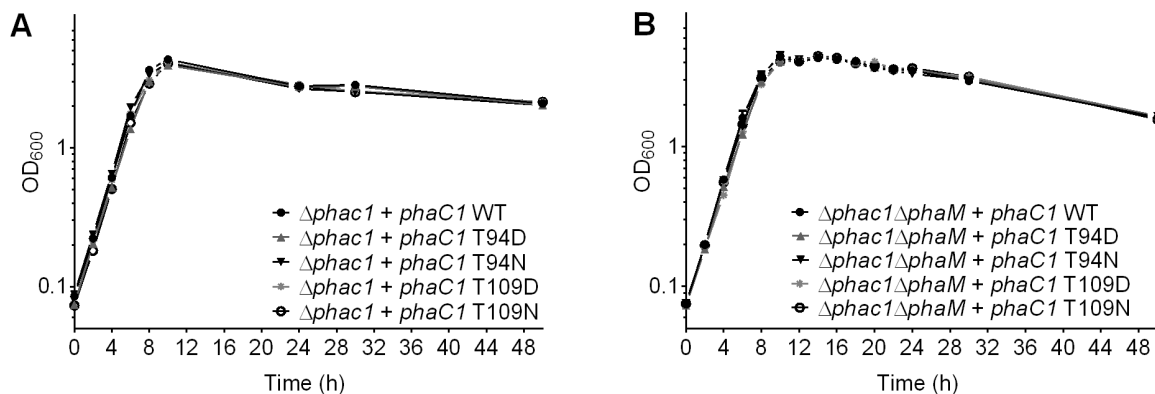

50 **Supplementary materials Fig. S4: Growth of *R. eutropha* H16 strains (A)** Growth of *R. eutropha*  $\Delta phaC$  (pBBR1MCS2\_*p<sub>phaC</sub>\_phaC1\_eyfp*), *R. eutropha*  $\Delta phaC1$  (pBBR1MCS2\_*p<sub>phaC</sub>\_phaC1\_T94D\_eyfp*), *R. eutropha*  $\Delta phaC1$  (pBBR1MCS2\_*p<sub>phaC</sub>\_phaC1\_T94N\_eyfp*), *R. eutropha*  $\Delta phaC1$  (pBBR1MCS2\_*p<sub>phaC</sub>\_phaC1\_T109D\_eyfp*) and *R. eutropha*  $\Delta phaC1$  (pBBR1MCS2\_*p<sub>phaC</sub>\_phaC1\_T109N\_eyfp*) on NB-medium with 0.2% gluconate. (B) Growth of *R. eutropha*  $\Delta phaC1 \Delta phaM$  (pBBR1MCS2\_*p<sub>phaC</sub>\_phaC1\_eyfp*), *R. eutropha*  $\Delta phaC1 \Delta phaM$  (pBBR1MCS2\_*p<sub>phaC</sub>\_phaC1\_T94D\_eyfp*), *R. eutropha*  $\Delta phaC1 \Delta phaM$  (pBBR1MCS2\_*p<sub>phaC</sub>\_phaC1\_T94N\_eyfp*), *R. eutropha*  $\Delta phaC1 \Delta phaM$  (pBBR1MCS2\_*p<sub>phaC</sub>\_phaC1\_T109D\_eyfp*) and *R. eutropha*  $\Delta phaC1 \Delta phaM$  (pBBR1MCS2\_*p<sub>phaC</sub>\_phaC1\_T109N\_eyfp*) on NB-medium with 0.2% gluconate.

60

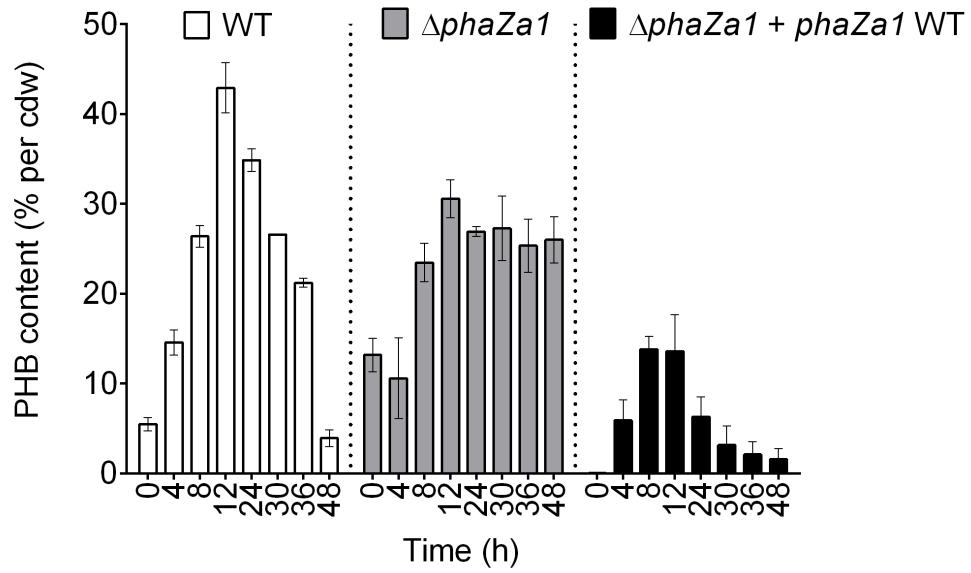

65 **Supplementary materials Fig. S5: PHB accumulation of *R. eutropha* strains over 48h.** PHB content per cellular dry weight of *R. eutropha* wild type, *R. eutropha*  $\Delta phaZa1$  and *R. eutropha*  $\Delta phaZa1$  (pBBR1MCS2\_*p<sub>phaC</sub>\_phaZa1\_eyfp*) on NB-medium with 0.2% gluconate (data were obtained from two biological and two technical replicates; error bars show the standard deviation).

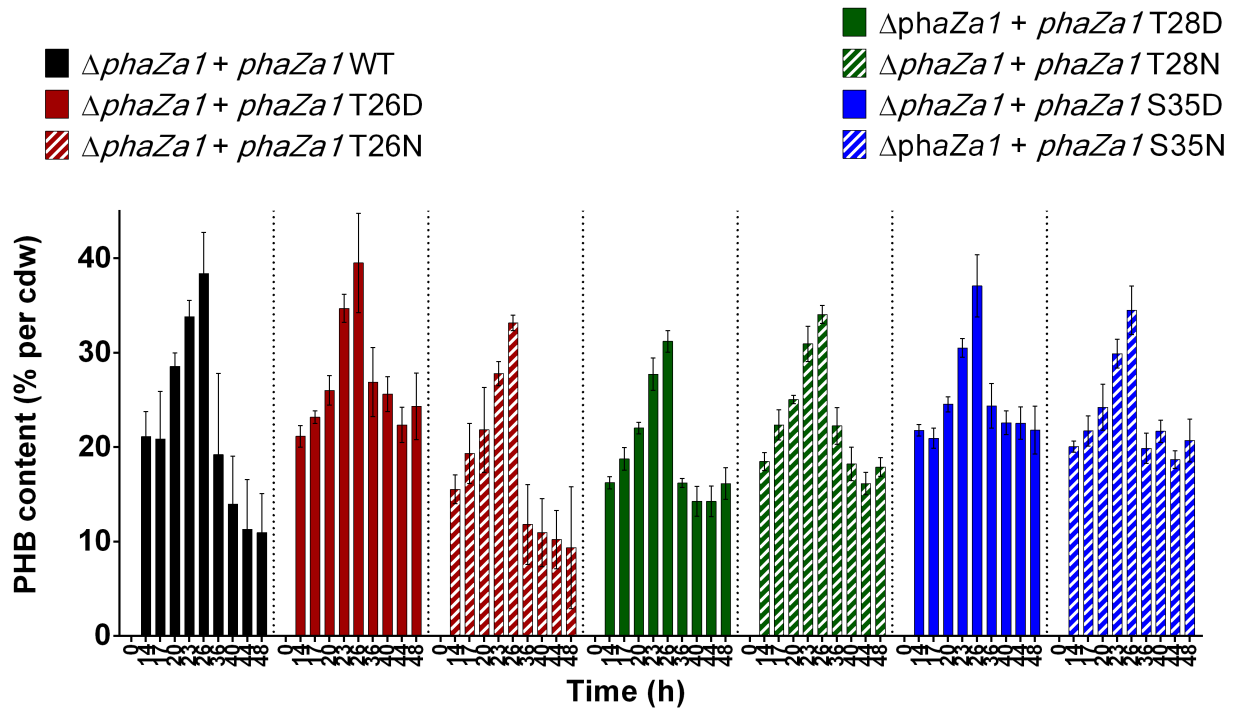

**Supplementary materials Fig. S6: PHB accumulation of *R. eutropha* H16 strains.** PHB contents of *R. eutropha*  $\Delta phaZa1$  (pBBR1MCS2\_ $p_{phaC}$ \_phaZa1\_eyfp), *R. eutropha*  $\Delta phaZa1$  (pBBR1MCS2\_ $p_{phaC}$ \_phaZa1\_T26D\_eyfp), *R. eutropha*  $\Delta phaZa1$  (pBBR1MCS2\_ $p_{phaC}$ \_phaZa1\_T26N\_eyfp), *R. eutropha*  $\Delta phaZa1$  (pBBR1MCS2\_ $p_{phaC}$ \_phaZa1\_T28D\_eyfp), *R. eutropha*  $\Delta phaZa1$  (pBBR1MCS2\_ $p_{phaC}$ \_phaZa1\_T28N\_eyfp), *R. eutropha*  $\Delta phaZa1$  (pBBR1MCS2\_ $p_{phaC}$ \_phaZa1\_S35D\_eyfp) and *R. eutropha*  $\Delta phaZa1$  (pBBR1MCS2\_ $p_{phaC}$ \_phaZa1\_S35N\_eyfp) on NB-medium with 0.5% Na-gluconate. The PHB content per cellular dry weight is shown. Data were obtained from 2 biological and 2 technical replicates; error bars show the standard deviation.

WT T373A T373D T373E T373N

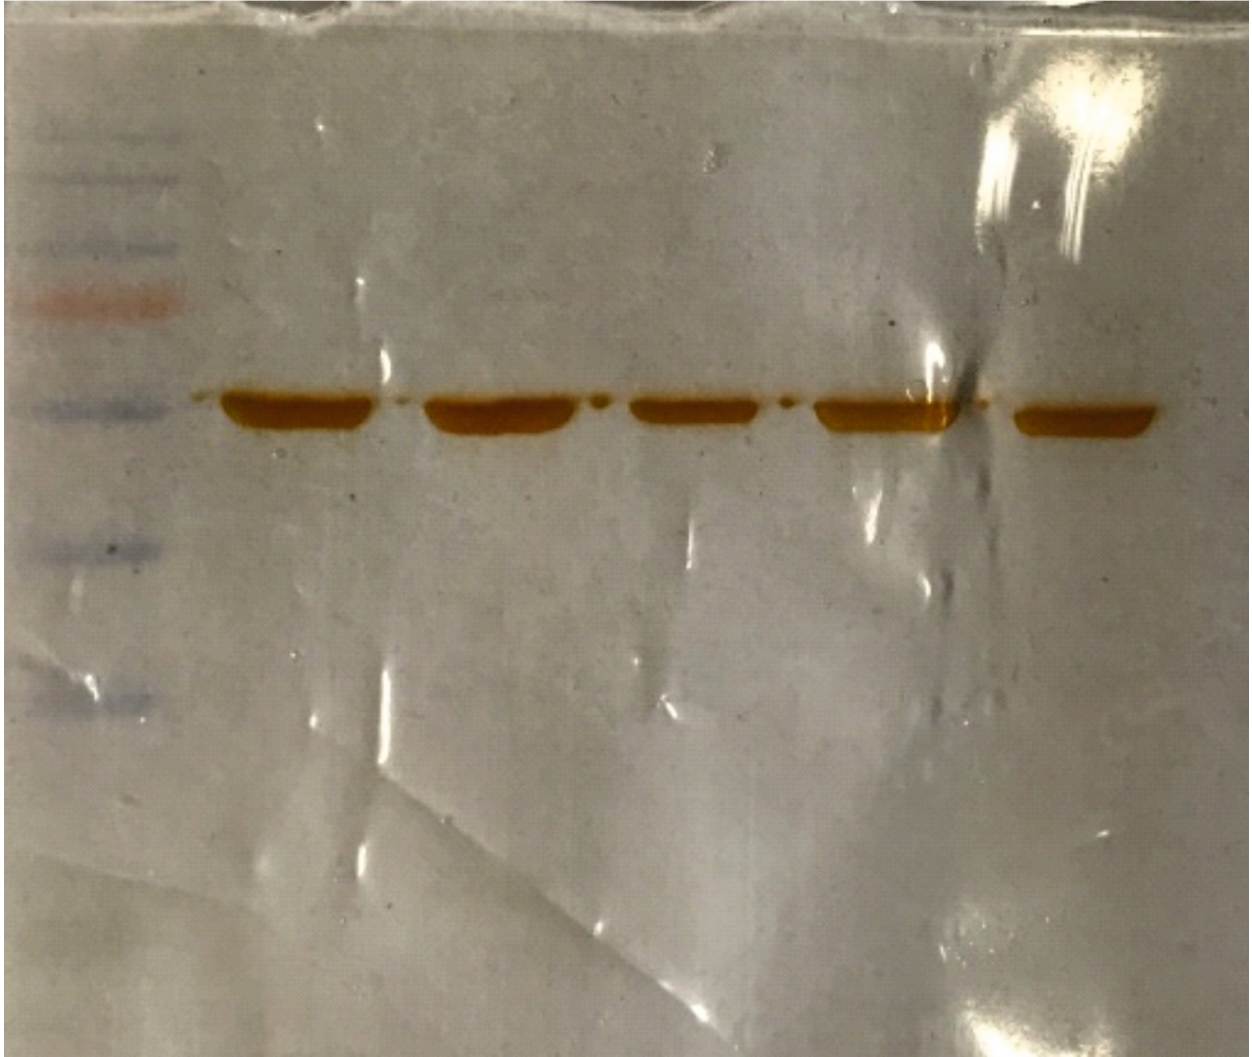

85 **Suppl. materials, Fig. S7:** SDS-PAGE analysis of purified PhaC1 mutants. Left lane shows marker proteins. Gel was stained with silver.

**Supplementary materials, Table S1: Summary of all PhaC1 mutants generated.**

90 For all of the mutants indicated a growth curve over 24h on NB-medium supplemented with 150µg/ml kanamycin and 0.2 % Na-gluconate (wt/vol) was recorded and the cells were stained with Nile red to visualize PHB and without any dye to visualize the eYFP-tagged PhaC1 by fluorescence microscopy.

| <b>Non-phosphorylatable</b> | <b>Microscopy</b> | <b>Phosphomimetic</b> | <b>Microscopy</b> |
|-----------------------------|-------------------|-----------------------|-------------------|
| <b>T30A</b>                 | As WT             | <b>T30D</b>           | As WT             |
| <b>T94N</b>                 | As WT             | <b>T94D</b>           | As WT             |
| <b>T109N</b>                | As WT             | <b>T109D</b>          | As WT             |
| <b>T373N, T373A</b>         | As WT             | <b>T373D, T373E</b>   | As WT             |

95
